# Supplementary material
Source: PubMed Central journal article supplement (PMC10311426)
Supplement: jamaotolaryngolheadnecksurg-e231327-s001.pdf [file jamaotolaryngolheadnecksurg-e231327-s001.pdf]

## Supplemental Online Content

Cejas I, Barker DH, Petruzzello E, Sarangoulis C, Quittner AL. Cochlear implantation and educational and quality-of-life outcomes in adolescence. *JAMA Otolaryngol Head Neck Surg*. Published online June 29, 2023. doi:10.1001/jamaoto.2023.1327

**eTable 1.** Woodcock Johnson Achievement Scores for individuals with SPHL and without CIs

**eTable 2.** Woodcock Johnson Achievement Scores for individuals with SPHL without CIs, income levels comparison (standard errors in parenthesis)

**eTable 3.** Woodcock Johnson Achievement Scores for individuals with SPHL without CIs and annual family income between \$25,000 and \$50,000

**eTable 4.** Woodcock Johnson Achievement Scores for individuals with SPHL without CIs and annual family income above \$50,000

**eTable 5.** Standard Scores from the CDaCI study for those implanted before 18 months

**eTable 6.** Standard Scores from the CDaCI study for those implanted after 18 months

**eTable 7.** Woodcock Johnson Achievement Scores for individuals with SPHL without CIs according to whether they were prescribed hearing aids or not

This supplemental material has been provided by the authors to give readers additional information about their work.

**eTable 1. Woodcock Johnson Achievement Scores for individuals with SPHL and without CIs**

| <b>Standard scores</b> | <b>Mean</b> | <b>Std. error</b> | <b>95% confidence int.</b> |
|------------------------|-------------|-------------------|----------------------------|
| Synonym-antonym        | 82.05       | 3.61              | [74.96, 89.13]             |
| Passage comprehension  | 74.14       | 4.12              | [66.06, 82.22]             |
| Calculation            | 91.47       | 3.13              | [85.33, 97.61]             |
| Applied problems       | 82.57       | 3.51              | [75.70, 89.44]             |
| Science                | 72.58       | 3.90              | [64.93, 80.23]             |
| Social science         | 80.16       | 2.83              | [74.61, 85.71]             |

**eTable 2. Woodcock Johnson Achievement Scores for individuals with SPHL without CIs and annual family income below \$25,000**

| <b>Standard scores</b> | <b>Mean</b> | <b>Std. error</b> | <b>95% confidence interval</b> |
|------------------------|-------------|-------------------|--------------------------------|
| Synonym-antonym        | 75.67       | 9.27              | [57.49, 93.85]                 |
| Passage comprehension  | 69.60       | 9.72              | [50.54, 88.66]                 |
| Calculation            | 88.15       | 5.50              | [77.37, 98.93]                 |
| Applied problems       | 77.55       | 8.17              | [61.54, 93.56]                 |
| Science                | 63.46       | 8.06              | [47.66, 79.26]                 |
| Social science         | 72.50       | 6.32              | [60.11, 84.88]                 |

**eTable 3. Woodcock Johnson Achievement Scores for individuals with SPHL without CIs and annual family income between \$25,000 and \$50,000**

| <b>Standard scores</b> | <b>Mean</b> | <b>Std. error</b> | <b>95% confidence interval</b> |
|------------------------|-------------|-------------------|--------------------------------|
| Synonym-antonym        | 81.24       | 8.71              | [64.15, 98.32]                 |
| Passage comprehension  | 72.30       | 11.02             | [50.70, 93.89]                 |
| Calculation            | 90.85       | 6.26              | [78.59, 103.12]                |
| Applied problems       | 82.21       | 6.68              | [69.12, 95.30]                 |
| Science                | 73.64       | 10.07             | [53.90, 93.38]                 |
| Social science         | 78.56       | 6.23              | [66.35, 90.77]                 |

**eTable 4. Woodcock Johnson Achievement Scores for individuals with SPHL without CIs and annual family income above \$50,000**

| <b>Standard scores</b> | <b>Mean</b> | <b>Std. error</b> | <b>95% confidence interval</b> |
|------------------------|-------------|-------------------|--------------------------------|
| Synonym-antonym        | 86.75       | 7.44              | [72.16, 101.33]                |
| Passage comprehension  | 78.81       | 7.57              | [63.97, 93.66]                 |
| Calculation            | 94.66       | 4.82              | [85.20, 104.12]                |
| Applied problems       | 86.58       | 3.48              | [79.75, 93.41]                 |
| Science                | 78.45       | 6.43              | [65.84, 91.06]                 |
| Social science         | 86.13       | 4.71              | [76.90, 95.37]                 |

**eTable 5. Standard Scores from the CDaCI study for those implanted before 18 months**

| <b>Standard Scores</b> | <b>Below \$50k</b> | <b>Above 50K</b> | <b>Overall</b> |
|------------------------|--------------------|------------------|----------------|
| Composite              | 83.55 (4.56)       | 96.74 (3.57)     | 93.34 (3.54)   |
| Antonyms               | 88.54 (4.51)       | 98.91 (3.36)     | 96.23 (3.25)   |
| Synonyms               | 88.65 (5.12)       | 100.29 (4.26)    | 96.89 (4.17)   |
| Reading fluency        | 102.14 (5.64)      | 115.73 (4.24)    | 112.65 (4.23)  |
| Passage comprehension  | 92.2 (4.54)        | 103.35 (3.42)    | 100.81 (3.41)  |
| Writing samples        | 104.12 (5.27)      | 114.89 (4.01)    | 112.33 (3.94)  |
| Calculation            | 99.01 (4.24)       | 106.83 (3.12)    | 105.08 (3.06)  |
| Written expression     | 99.2 (5.53)        | 109.44 (4.13)    | 107.07 (4.05)  |
| Math fluency           | 90.56 (4.66)       | 97.57 (3.47)     | 95.88 (3.35)   |
| Writing fluency        | 97.5 (4.85)        | 107.53 (3.54)    | 105.42 (3.51)  |

**eTable 6. Standard Scores from the CDaCI study for those implanted after 18 months**

| <b>Standard Scores</b> | <b>Below \$50k</b> | <b>Above 50K</b> | <b>Overall</b> |
|------------------------|--------------------|------------------|----------------|
| Composite              | 71.8 (3.33)        | 84.98 (2.92)     | 79.41 (2.44)   |
| Antonyms               | 78.29 (3.57)       | 88.66 (3.34)     | 83.92 (2.75)   |
| Synonyms               | 79.99 (3.63)       | 91.62 (3)        | 87.05 (2.53)   |
| Reading fluency        | 94.18 (4.24)       | 107.78 (3.36)    | 102.79 (2.9)   |
| Passage comprehension  | 79.13 (3.42)       | 90.28 (2.7)      | 86.2 (2.34)    |
| Writing samples        | 90.6 (4.03)        | 101.37 (3.1)     | 97.58 (2.68)   |
| Calculation            | 92.82 (3.4)        | 100.64 (2.39)    | 98.26 (2.13)   |
| Written expression     | 88.48 (4.43)       | 98.73 (3.11)     | 95.62 (2.77)   |
| Math fluency           | 86.7 (3.84)        | 93.71 (2.73)     | 91.58 (2.41)   |
| Writing fluency        | 85.47 (3.76)       | 95.5 (2.78)      | 92.19 (2.44)   |

**eTable 7. Woodcock Johnson Achievement Scores for individuals with SPHL without CIs according to whether they were prescribed hearing aids or not**

| <b>Standard scores</b> | <b>Mean (no hearing aid)</b> | <b>95% confidence int.</b> | <b>Mean (prescribed hearing aid)</b> | <b>95% confidence int.</b> |
|------------------------|------------------------------|----------------------------|--------------------------------------|----------------------------|
| Synonym-antonym        | 81.28                        | [70.41, 92.15]             | 82.12                                | [74.64, 89.60]             |
| Passage comprehension  | 69.11                        | [56.89, 81.32]             | 74.60                                | [65.93, 83.28]             |
| Calculation            | 90.28                        | [74.13, 106.43]            | 91.58                                | [85.55, 97.60]             |
| Applied problems       | 81.22                        | [67.67, 94.78]             | 82.70                                | [75.56, 89.84]             |
| Science                | 73.96                        | [56.97, 90.95]             | 72.45                                | [64.20, 80.71]             |
| Social science         | 78.23                        | [67.65, 88.82]             | 80.34                                | [74.22, 86.47]             |
