# Supplementary material
Source: PubMed Central journal article supplement (PMC10311426)
Supplement: jamaotolaryngolheadnecksurg-e231327-s002.pdf [file jamaotolaryngolheadnecksurg-e231327-s002.pdf]

## Data Sharing Statement

Cejas. Cochlear Implantation and Educational and Quality-of-Life Outcomes in Adolescence. *JAMA Otolaryngol Head Neck Surg*. Published June 29, 2023. doi:10.1001/jamaoto.2023.1327

### Data

**Data available:** No

### Additional Information

**Explanation for why data not available:** We are unable to share the data utilized in this study as one of the datasets (NLTS-2) is a US government restricted use database and is regulated by the Institute of Education Sciences, which requires request for permission and signing of affidavits prior to use.
